# Supplementary material for: Solar Nuclear Fusion Force Field Equation
Source: Research Square preprint supplement (doi:10.21203/rs.3.rs-8170860/v1), 2025-12-18
Supplement: Supplementary file 1 [file 2f8c5ac13c724dc0a674ad07.docx]

Supplementary Material

2.1．Macroscopic Scale Application -------------------------------------------------------------------------2

2.1.1．The equivalent mass areal density **()** -------------------------------------------------------------2

## 1．The equivalent mass areal density ------------------------------------------------------------------2

2．The equivalent mass areal density ------------------------------------------------------------------2

3．The equivalent mass areal density ------------------------------------------------------------------3

4．The equivalent mass areal density ------------------------------------------------------------------3

5．The equivalent mass areal density ------------------------------------------------------------------4

6．The equivalent mass areal density ------------------------------------------------------------------4

7．The equivalent mass areal density ------------------------------------------------------------------5

8．The equivalent mass areal density ------------------------------------------------------------------5

9．The equivalent mass areal density ------------------------------------------------------------------6

2.1.2．Gravitational Force Derivation -----------------------------------------------------------------------6

2.1.3．Solar Constant Derivation -----------------------------------------------------------------------------8

2.1.4．Blackbody Radiation and Solar Surface Temperature --------------------------------------------10

2.1.5. The Mass of the Moon---------------------------------------------------------------------------------11

2.2．Microscopic Scale Application ------------------------------------------------------------------------12

2.2.1. Electron Radius in Hydrogen-------------------------------------------------------------------------12

2.2.2．Rydberg Energy**-**Niels Bohr’s [Quantized](https://www.physicsclassroom.com/Chemistry-Tutorial/Modern-Atomic-Model/Emission-Spectrum#p6) Model --------------------------------------------------12

2.2.3. Hydrogen Atom Electron Orbital Radius-----------------------------------------------------------13

**2.1．Macroscopic Scale Application**

**2.1.1 The equivalent mass areal density ()**

**1 The equivalent mass areal density**

Mercuryis one of the eight planets in the solar system, with a mass of 3.301×1023kg, an equatorial radius of 2.4405×106m, a mean orbit velocity of 4.7360×104m/s, and a surface area of 7.4846×1013m². Moreover, the aphelion revolution velocity is 3.8860×104 m/s, and the perihelion revolution velocity is 5.8970×104m/s. The aphelion surface area of the sun () is 1.856422×109m². The perihelion surface area of the sun () is 4.280513×109m². Additionally, the speed of light in the solar system is set as 2.99792458×108m/s [30,31].

According to (8),  (1)

≈

≈1.490422×106 (kg/m²) (2)

The planet always keeps half its area to be irradiated by the Sun, so it is necessary to use the virtual factor () to derive the equivalent mass areal density of the planet’s.

Then, (half of Mercury’s surface area) (3)

≈1.222059×102 (kg/m²) (4)

**2 The equivalent mass areal density**

Venushas a mass of 4.8673×1024kg, an equatorial radius of 6.0518×106m, a mean orbit velocity of 3.5020×104m/s, and a surface area of 4.6023×1014m². Moreover, the aphelion revolution velocity is 3.4783×104m/s, and the perihelion revolution velocity is 3.5257×104m/s. The aphelion surface area of the sun is 4.692690×109m². The perihelion surface area of the sun is 4.821831×109m². The eccentricity (0.00677672) of Venus’s orbit is closer to a perfect circle (Fig.2) than that of other planets, which is an ideal object for the study of gravitational interaction.

According to (6),  (5)

≈

≈ 6.961087×106 (kg/m²) (6)

Then,  (7)

(kg/m²) (8)

**3** **The equivalent mass areal density**

Earthhas a mass of 5.9722×1024kg, an equatorial radius of 6.3781×106m, a mean orbit velocity of 2.9783×104m/s, and a surface area of 5.1120×1014m². Its aphelion revolution velocity is 2.9285×104m/s, and its perihelion revolution velocity is 3.0281×104m/s. Moreover, its aphelion surface area () is 2.674585×109m², and its perihelion surface area () is 2.857933×109 m².

According to (6),  (9)

≈

≈ 1.075089×107 (kg/m²) (10)

Then, (11)

≈ 1.163527×102 (kg/m²) (12)

**4 The equivalent mass areal density**

Marshas a mass of 6.4169×1023kg, an equatorial radius of 3.3962×106m, a mean orbit velocity of 2.4080×104m/s, and a surface area of 1.4494×1014m². Moreover, the aphelion revolution velocity is 2.1970×104m/s, and the perihelion revolution velocity is 2.6500×104m/s. The aphelion surface area of the sun is 2.825201×108m². The perihelion surface area of the sun is 4.110080×108m².

According to (6),  (13)

≈

≈ 6.100465×106 (kg/m²) (14)

Then, (15)

≈ 2.919031×10(kg/m²) (16)

**5 The equivalent mass areal density**

Jupiterhas a mass of 1.89813×1027kg, an equatorial radius of 7.1492×107m, a mean orbit velocity of 1.3060×104m/s, and a surface area of 6.14228×1016m². Moreover, the aphelion revolution velocity is 1.2440×104m/s, and the perihelion revolution velocity is 1.3720×104m/s. The aphelion surface area of the sun is 1.165695×1010m². The perihelion surface area of the sun is 1.416951×1010m².

According to (6),  (17)

≈

≈ 1.406777×108 (kg/m²) (18)

Then, (19)

≈ 5.914866×10 (kg/m²) (20)

**6 The equivalent mass areal density**

Saturnhas a mass of approximately 5.6834×1026kg, an equatorial radius of 6.0268×107m, a mean orbit velocity of 0.96391×104m/s, and a surface area of 4.5644×1016m². Moreover, its aphelion revolution velocity is 0.9120×104m/s, and its perihelion revolution velocity is 1.0158×104m/s. Its aphelion surface area () is 2.413064×109m², and its perihelion surface area () is 3.014174×109m².

According to (7), (21)

≈

≈1.052549×108 (kg/m²) (22)

According to (9), we have

(23)

≈ 1.251519×10 (kg/m²) (24)

**7 The equivalent mass areal density**

Uranushas a mass of 8.6811×1025kg, an equatorial radius of 2.5559×107m, a mean orbit velocity of 6.790×103m/s, and a surface area of 8.2091×1015m². Moreover, the aphelion revolution velocity is 6.490×103m/s, and the perihelion revolution velocity is 7.130×103m/s. The aphelion surface area of the sun is 1.100773×108m². The perihelion surface area of the sun is 1.315826×108m².

According to (6),  (25)

≈

≈ 1.957559×108 (kg/m²) (26)

Then, (27)

≈ 5.762672 (kg/m²) (28)

**8 The equivalent mass areal density**

Neptunehas a mass of 1.02409×1026kg, an equatorial radius of 2.4764×107m, a mean orbit velocity of 5.450×103m/s, and a surface area of 7.7064×1015m². Moreover, the aphelion revolution velocity is 5.370×103m/s, and the perihelion revolution velocity is 5.470×103m/s. The aphelion surface area of the sun is 4.490439×107m². The perihelion surface area of the sun is 4.668631×107 m².

According to (6),  (29)

≈

≈ 3.465835×108 (kg/m²) (30)

Then, (31)

≈ 4.119151 (kg/m²) (32)

**9 The equivalent mass areal density**

Plutohas a mass of 1.3030×1022kg, an equatorial radius of 1.1880×106m, a mean orbit velocity of 4.640×103m/s, and a surface area of 1.7735×1013m². Moreover, the aphelion revolution velocity is 3.710×103m/s, and the perihelion revolution velocity is 6.100×103m/s. The aphelion surface area of the sun is 0.402353×105m². The perihelion surface area of the sun is 1.091985×105m².

According to (6),  (33)

≈

≈ 2.464464×107 (kg/m²) (34)

Then, (35)

≈ 0.207654 (kg/m²) (36)

**Table 3:** **The equivalent mass areal density () of planet’s**

|  | *Mercury* | *Venus* | *Earth* | *Mars* | *Jupiter* |
| --- | --- | --- | --- | --- | --- |
| **1** | 122.2059 | 143.9094 | 116.3527 | 29.19031 | 59.14866 |
| **2** | *Saturn* | *Uranus* | *Neptune* | *Pluto* |  |
| **3** | 12.51519 | 5.762672 | 4.119151 | 0.207654 |  |

**2.1.2．Gravitational Force Derivation**

The Sun has a mass of 1.9884×1030kg, an equatorial radius of 6.957×108m, a surface area of 6.08210×1018m², and nominal Solar luminosity 3*.*828×1026 W. Additionally, the earth heliocentric distance is 1.496×1011 m.

**Table 1:** The heliocentric distance of the planet’s /m.

|  | *Mercury* | *Venus* | *Earth* | *Mars* | *Jupiter* |
| --- | --- | --- | --- | --- | --- |
| **1** | 5.7909×1010 | 1.0821×1011 | 1.4960×1011 | 2.2796×1011 | 7.7848×1011 |
| **2** | *Saturn* | *Uranus* | *Neptune* | *Pluto* |  |
| **3** | 1.4320×1012 | 2.8670×1012 | 4.5150×1012 | 5.8697×1012 |  |

**Newton’s law of gravitation**, statement that any particle of matter in the universe attracts any other with a force varying directly as the product of the masses and inversely as the square of the distance between them. Additionally, the gravitational constant is 6.6743×10-11m3‧kg-1‧s-2.

According to the orbital kinetic energy of the planets;

*1.Mercury*

**The standard gravitational formula**：

*2. Venus*

**The standard gravitational formula**：

*3. Earth*

**The standard gravitational formula**：

*4. Mars*

**The standard gravitational formula**：

*5. Jupiter*

**The standard gravitational formula**：

*6. Saturn*

**The standard gravitational formula**：

*7. Uranus*

**The standard gravitational formula**：

*8. Neptune*

**The standard gravitational formula**：

*9. Pluto*

**The standard gravitational formula**：

Table 4: Planetary gravitational force data obtained using **Method 1**.

|  | *Mercury* | *Venus* | *Earth* | *Mars* | *Jupiter* |
| --- | --- | --- | --- | --- | --- |
| **1** | 1.4196×1022 | 5.5010×1022 | 3.5734×1022 | 1.6681×1021 | 4.1943×1023 |
| **2** | *Saturn* | *Uranus* | *Neptune* | *Pluto* |  |
| **3** | 3.5853×1022 | 1.4830×1021 | 6.3189×1020 | 5.6390×1016 |  |

Table 5: Planetary gravitational data obtained using **the standard gravitational formula**.

|  | *Mercury* | *Venus* | *Earth* | *Mars* | *Jupiter* |
| --- | --- | --- | --- | --- | --- |
| **1** | 1.3063×1022 | 5.5165×1022 | 3.5414×1022 | 1.6388×1021 | 4.1565×1023 |
| **2** | *Saturn* | *Uranus* | *Neptune* | *Pluto* |  |
| **3** | 3.6781×1022 | 1.4016×1021 | 6.6672×1020 | 5.0190×1016 |  |

**2.1.3．Solar Constant Derivation**

**Method 1**:  , :

*1.Mercury*

*2. Venus*

*3. Earth*

*4. Mars*

*5. Jupiter*

*6. Saturn*

*7. Uranus*

*8. Neptune*

*9. Pluto*

**Table 6-1:** According to the heliocentric distance of the planet’s (Table 1), solar constant.

|  | *Mercury* | *Venus* | *Earth* | *Mars* | *Jupiter* |
| --- | --- | --- | --- | --- | --- |
| **1** | 9083.8 | 2601.5 | 1361.1 | 586.2 | 50.265 |
| **2** | *Saturn* | *Uranus* | *Neptune* | *Pluto* |  |
| **3** | 14.855 | 3.7026 | 1.4943 | 0.8828 |  |

**Method 2:** According to the theoretical formula (3) the relative area of the planet and the sun, the area of the solar constant is directly proportional to the energy.

Then, (20)

(W) (21)

*1.Mercury*

Then,

*2. Venus*

(W/m²)

*3. Earth*

*4. Mars*

*5. Jupiter*

*6. Saturn*

*7. Uranus*

*8. Neptune*

≈ 1.4960 (W/m²)

*9. Pluto*

**Table 6-2:** The solar constant obtained according to **method 2**.

|  | *Mercury* | *Venus* | *Earth* | *Mars* | *Jupiter* |
| --- | --- | --- | --- | --- | --- |
| **1** | 10321 | 2602.3 | 1362.3 | 602.31 | 52.925 |
| **2** | *Saturn* | *Uranus* | *Neptune* | *Pluto* |  |
| **3** | 14.967 | 3.7055 | 1.4960 | 1.0606 |  |

**2.1.4 Blackbody Radiation and Solar Surface Temperature**

The surface of the Sun is known as the photosphere, and the temperature reaches is 5772 Kelvin (K; 10000 degrees °F), the radiant energy it produces is the source of the Earth’s light and heat. Additionally, Stefan-Boltzmann constant is 5.670374419×10⁻⁸ W·m⁻²· K⁻4.

According to the Stefan-Boltzmann law of blackbody radiation45,46,47,59；

(28)

The radiation flux on the solar surface is: (29)

Substituting the radiant flux into the equation (19):

(30)

(31)

(32)

≈ 5771.9740436 K (33)

**2.1.5. The Mass of the Moon**

The mass of the moonis approximately 7.346×1022kg, its equatorial radius is 1.7381×106m, its mean orbit velocity is 1.022×103m/s, and its surface area is 3.796290×1013m². Its apogee revolution velocity is 0.9654×103m/s, and its perigee revolution velocity is 1.0786×103m/s. Moreover, the apogee surface area () is 2.348191×109m², and its perigee surface area () is 2.925288×109m².

The equivalent mass areal density of the Earth’s , the following calculations are applied.

According to (9) and (11), we have

(34)

≈

≈ 3.755186×1026 (35)

≈ 3.798180×1026（kg）

The value in (29) is incorrect and does not match the actual value. Thus, it is calculated according to the following method.

According to (6), we have

(36)

≈

≈ 5.216383×1022(kg) (37)

**2.2 Microscopic Scale Application**

**2.2.1. Electron Radius in** **Hydrogen**

The simplest hydrogen atom in nature, which contains a positively charged proton and a negatively charged electron and is bound to the nucleus by Coulomb’s law.

The electron of the hydrogen atoms orbit it the nucleus in a perfectly circular pattern, according to the law of the conservation of energy.

, where *ve=*α*C* is known (38)

Then, (39)

(40)

≈ 2.4960388×10-17(m) (41)

2.2.2、**Rydberg Energy-Niels Bohr’s** [**Quantized**](https://www.physicsclassroom.com/Chemistry-Tutorial/Modern-Atomic-Model/Emission-Spectrum#p6)**Model**

Based on (41) electron radius, apply the following calculations to it.

According to the theory formula (3), it is Extended to the Niels Bohr’s [quantized](https://www.physicsclassroom.com/Chemistry-Tutorial/Modern-Atomic-Model/Emission-Spectrum#p6) energy levels.

(42)

For ground-state (n=1), (43)

(44)

Converted to Electron Volts (eV):

(45)

Then, (46)

For any quantum number n, the energy level formula is:

(47)

**2.2.3. Hydrogen Atom Electron Orbital Radius**

(48)

We have (49)

According to the law of the conservation of energy,

(50)

According to (49) and (50), we have

(51)

For ground-state (n=1), (h=6.6260755 (40)×10-34 J·s) (52)

≈ 5.29177656×10-11m （53）
